# Supplementary material
Source: publisher figshare collection journal article supplement (https://brill.figshare.com/articles/dataset/_/19115240)
Supplement: Supplementary file 1 [file 1]

**The genus *Raysymmela* Saylor, 1947 (Coleoptera,  
Scarabaeidae, Melolonthinae, Sericini): taxonomy and  
phylogenetic analysis**

**Thaynara L. Pacheco<sup>a,b,\*</sup>, Benedict Wipfler<sup>b</sup>, Marcela L. Monné<sup>a</sup> and Dirk Ahrens<sup>b</sup>**

<sup>a</sup>Laboratório de Coleoptera, Departamento de Entomologia, Museu Nacional,  
Universidade Federal do Rio de Janeiro, Rio de Janeiro, 20940040, Brazil

<sup>b</sup>Centre of Taxonomy and Evolutionary Research, Zoologisches Forschungsmuseum  
Alexander Koenig, 53113 Bonn, Germany

\*Correspondent author: [thay.lpacheco@gmail.com](mailto:thay.lpacheco@gmail.com)

ORCID iDs: Pacheco: 0000-0001-9503-7751; Wipfler: 0000-0002-7533-9821; Monné:  
0000-0003-2103-4878; Ahrens: 0000-0003-3524-7153

Zoobank iDs: Pacheco: urn:lsid:zoobank.org:author:146CF81B-1394-456C-A768-  
BFFDE3E213D0; Wipfler: urn:lsid:zoobank.org:author:5CFF02CD-A192-4D3B-A809-  
DCF743916A74; Monné: urn:lsid:zoobank.org:author:6C002711-20A8-4747-AEF5-  
A80E9196720D; Ahrens: urn:lsid:zoobank.org:author:DEDCE5CF-AA11-4BBF-  
A2C6-D7C815019714

**Supplementary material**

**Table S2.** Morphological character matrix used for the cladistic analysis of the genus *Raysymmela*. (Polymorphic character states are shown by letter codes: a = (0&1); b = (0&2); c = (0&3); d = (1&2)).

|                                       | 111111111122222222233333333344444444455555555566666666677777777788888888899999999900000000011111111122222222<br>12345678901234567890123456789012345678901234567890123456789012345678901234567890123456789012345678901234567890123456 |
|---------------------------------------|--------------------------------------------------------------------------------------------------------------------------------------------------------------------------------------------------------------------------------------|
| <i>Camenta innocua</i>                | 1111011023101000011102011231-00000001120022001200-101001-111010100011010000--02000020000011110101010002101000100?0003210----0                                                                                                        |
| <i>Omaloplia ruricola</i>             | 2210101012101000011101100330300000002411120101200-1111120b00001000211111100--0000021001110011110010111220-0--0110010-4010----0                                                                                                       |
| <i>Pleophylla navicularis</i>         | 121a100022101000011102011421-00010112111110111000-1101114d01021000211111000--0200000001110011100210101420-100011000004110----0                                                                                                       |
| <i>Astaena sulcatipennis</i>          | 11110111211200011110010003302002000011200111110011101001-000021110221011210000202002001001100101100000000-11010000101000120000                                                                                                       |
| <i>Astaena tridentata</i>             | 111000112301100001010100013020000000d100022001000-100001-20000111021101001000020000000100010101111010011110100000103100110000                                                                                                        |
| <i>Miotemna singularis</i>            | 1111001101011000011100111221-00000001100010101100-120001-10100111021101101000020000200100011102111011101110--00100112000110100                                                                                                       |
| <i>New genus sp. 1</i>                | a10--31010110110101310000310111321001320020001200-200002-10000100100000221011010111310000001101100110010-0--00000102010100000                                                                                                        |
| <i>New genus sp. 2</i>                | a10--31010110110101310000310111321001320020001200-200002-10000100100000221011010111310000001101100110010-0--00000102010100000                                                                                                        |
| <i>Sayloria abccora</i>               | 2110010020100002111100100000100100011410110101010-0000aad000000000200011110010200000002001101000101010000-01010000102210120100                                                                                                       |
| <i>Sayloria bicoloripes</i>           | 2a11010023101000011101100100000100000210022101001-10101a3000000100200011210000000000101000101101100011100-11010000112000120100                                                                                                       |
| <i>Symmela instabilis</i>             | 2a1100100011100011110010030010000010b4100301003011200000-20010100101100121101000210410000001101110010001100100000010200110100                                                                                                        |
| <i>Symmela nitida</i>                 | 2111000010111000001100100300100000001010010001000-2000103100001000011001201--000210210000000010111011000110--00000002000100000                                                                                                       |
| <i>Raysymmela bruchi</i>              | 2111011020111000111100100330200000001400010101000-1000113100101001011110210001100003112000011101110010001010000011103200101211                                                                                                       |
| <i>Raysymmela costaricensis</i>       | 2211001000111000010000100010100000002410020101000-100000-200101001011111210000010003112000011101210010000010000010003300100201                                                                                                       |
| <i>Raysymmela curtula</i>             | 2111011003001000101100000120100000001400020000000-100012011010101001101121000000000010000001110111001000100--0000000000111100                                                                                                        |
| <i>Raysymmela equatorialis</i> sp. n. | 2111001000110001021101100330000000001100002000100101000120110121001111010210010110113112000011101010010001010000010000400100210                                                                                                      |
| <i>Raysymmela erwini</i> sp. n.       | 2b11001000110000021000100100200000002411030101200-0000103200101001011011210000110000112000011101210110301010100010000300100211                                                                                                       |
| <i>Raysymmela huanuca</i>             | 221100001011100002110010011010000000201001000101100000120110101001011011d10000010000112000011101210010301010100010000300100211                                                                                                       |
| <i>Raysymmela pallipes</i>            | 221100001011000001110010033020000001241102000100110000120200101001011010210001010000112000011101210010001010100010000300100211                                                                                                       |
| <i>Raysymmela seticollis</i>          | 221100102011100001120000012010001000b400010001000-110110c10000101001101111001000000010000001110111001000110--00000102200100000                                                                                                       |
| <i>Raysymmela varians</i>             | 221102102011100011110010030010000000b4000210010011200000-000101001011110210000110003111000011101210110100010100011003200100210                                                                                                       |
